# Supplementary material for: Cryptic ecology among host generalist Campylobacter jejuni in domestic animals
Source: PubMed Central journal article supplement (PMC4237157; doi:10.1111/mec.12742), 2014-04-25

A

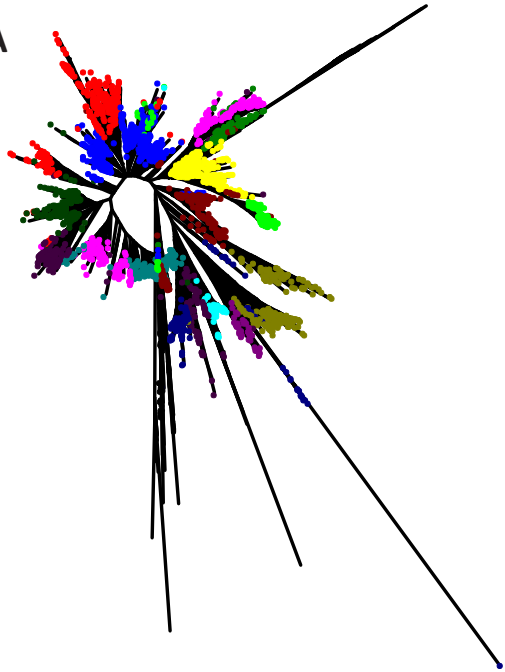

B

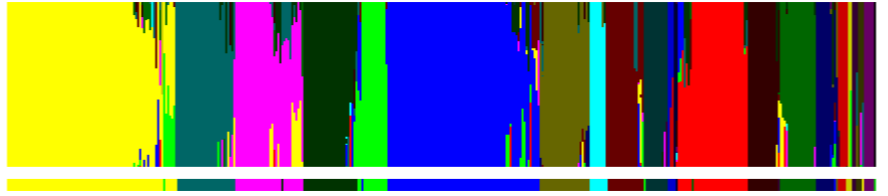

Supplement: mec0023-2442-SD3.pdf [file mec0023-2442-SD3.pdf]
