# Supplementary material for: Cryptic ecology among host generalist Campylobacter jejuni in domestic animals
Source: PubMed Central journal article supplement (PMC4237157; doi:10.1111/mec.12742), 2014-04-25
Supplement: mec0023-2442-SD10.pdf [file mec0023-2442-SD10.pdf]

**Table S2.** Isolate details.

| Isolate <sup>1</sup> | ID  | Total length<br>(bp) | source   | country     | year | ST <sup>2</sup> | clonal<br>complex <sup>3</sup> |
|----------------------|-----|----------------------|----------|-------------|------|-----------------|--------------------------------|
| goose255             | 126 | 1663834              | Goose    | UK          | 2007 | 1033            | 1034                           |
| CjLMG23357           | 184 | 1694896              | Clinical | Netherlands |      | 4883            | 1275                           |
| goose3               | 129 | 1561449              | Goose    | UK          | 2007 | 696             | 1332                           |
| CT43850              | 122 | 1582720              | Starling | UK          | 2007 | 177             | 177                            |
| CjLMG23211           | 214 | 1669921              | Chicken  | Belgium     |      | 220             | 179                            |
| CjLMG23264           | 179 | 1719111              | Clinical | Slovenia    |      | 46              | 206                            |
| CjATCC43432          | 207 | 1703446              | Clinical | Canada      |      | 122             | 206                            |
| 7938-1               | 48  | 1671619              | Cattle   | UK          | 2006 | 206             | 206                            |
| 130                  | 99  | 1720953              | Cattle   | UK          | 2003 | 206             | 206                            |
| 158                  | 87  | 1715399              | Cattle   | UK          | 2003 | 273             | 206                            |
| Cj2008-988           | 192 | 1818384              | Clinical | France      |      | 572             | 206                            |
| 87                   | 97  | 1629692              | Cattle   | UK          | 2003 | 19              | 21                             |
| 7030A2               | 40  | 1726327              | Chicken  | UK          | 2006 | 21              | 21                             |
| 8464                 | 59  | 1705325              | Cattle   | UK          | 2006 | 21              | 21                             |
| 8606                 | 62  | 1658436              | Cattle   | UK          | 2006 | 21              | 21                             |
| 7366                 | 63  | 1679349              | Chicken  | UK          | 2006 | 21              | 21                             |
| 185                  | 89  | 1659711              | Cattle   | UK          | 2003 | 21              | 21                             |
| F12B1                | 110 | 1656261              | Chicken  | UK          | 2003 | 21              | 21                             |
| 3                    | 117 | 1697696              | Clinical | UK          | 2003 | 21              | 21                             |
| NC_002163            | 29  | 1641481              | Clinical | UK          | 2000 | 43              | 21                             |
| CjLMG9879            | 182 | 1650086              | Clinical | Canada      |      | 47              | 21                             |
| Cj2008-1025          | 189 | 1656768              | Clinical | France      |      | 50              | 21                             |
| Cj2008-831           | 195 | 1606170              | Clinical | France      |      | 50              | 21                             |
| 508-3754             | 71  | 1689713              | Chicken  | UK          | 2009 | 50              | 21                             |
| S07-0761             | 72  | 1692341              | Chicken  | UK          | 2009 | 50              | 21                             |
| 508-2543             | 77  | 1692435              | Chicken  | UK          | 2009 | 50              | 21                             |
| 508-2574             | 78  | 1693941              | Chicken  | UK          | 2009 | 50              | 21                             |
| Cj87330              | 203 | 1618859              | Chicken  | USA         |      | 50              | 21                             |
| 274                  | 60  | 1658292              | Clinical | UK          | 2005 | 53              | 21                             |
| S07-2406             | 73  | 1651079              | Chicken  | UK          | 2009 | 53              | 21                             |
| 10040                | 65  | 1761202              | Chicken  | UK          | 2006 | 104             | 21                             |
| 195                  | 94  | 1762939              | Cattle   | UK          | 2003 | 104             | 21                             |
| 526                  | 34  | 1643032              | Clinical | UK          | 2005 | 262             | 21                             |
| S07-1597             | 74  | 1606379              | Chicken  | UK          | 2009 | 262             | 21                             |
| 2850                 | 36  | 1695272              | Clinical | UK          | 2006 | 266             | 21                             |
| S08-0575             | 75  | 1693845              | Chicken  | UK          | 2009 | 266             | 21                             |
| Cj1928               | 211 | 1744799              | Cattle   | USA         |      | 806             | 21                             |
| 5075                 | 37  | 1667560              | Clinical | UK          | 2006 | 883             | 21                             |
| F7B1                 | 113 | 1665144              | Chicken  | UK          | 2004 | 883             | 21                             |
| Cj110-21             | 202 | 1615152              | Cattle   | USA         |      | 982             | 21                             |

**Table S2 - continued.**

| Isolate       | ID  | Total length<br>(bp) | source   | country | year | ST <sup>1</sup> | clonal<br>complex <sup>2</sup> |
|---------------|-----|----------------------|----------|---------|------|-----------------|--------------------------------|
| Cj1997-11     | 199 | 1598427              | Clinical | USA     |      | 22              | 22                             |
| F7A20         | 105 | 1697013              | Chicken  | UK      | 2004 | 257             | 257                            |
| 48321         | 22  | 1573736              | Chicken  | UK      | 2001 | 257             | 257                            |
| S07-0533      | 80  | 1734017              | Chicken  | UK      | 2009 | 2030            | 257                            |
| NC 009839     | 26  | 1628115              | Clinical | UK      | 2007 | 267             | 283                            |
| 6760          | 54  | 1591217              | Chicken  | UK      | 2005 | 267             | 283                            |
| S07-4547      | 66  | 1776210              | Chicken  | UK      | 2009 | 353             | 353                            |
| Cj87459       | 204 | 1772922              | Chicken  | USA     |      | 452             | 353                            |
| Cj51037       | 201 | 1747053              | Chicken  | USA     |      | 939             | 353                            |
| Cj51494       | 173 | 1799590              | Chicken  | USA     |      | 4834            | 353                            |
| CjLMG23269    | 180 | 1735582              | Chicken  | Belgium |      | 4837            | 353                            |
| Cj53161       | 187 | 1730741              | Chicken  | USA     |      | 4838            | 353                            |
| Cj1997-14     | 200 | 1767166              | Clinical | USA     |      | 5159            | 353                            |
| 508-2669      | 67  | 1688706              | Chicken  | UK      | 2009 | 354             | 354                            |
| 508-2836      | 83  | 1667030              | Chicken  | UK      | 2009 | 354             | 354                            |
| NC 003912     | 28  | 1777831              | Chicken  | USA     | 2002 | 354             | 354                            |
| 111           | 88  | 1716038              | Cattle   | UK      | 2003 | 270             | 403                            |
| CjATCC33560T  | 185 | 1714676              | Cattle   | Belgium |      | 403             | 403                            |
| 7620          | 42  | 1672737              | Cattle   | UK      | 2006 | 42              | 42                             |
| Cj129-258     | 172 | 1643841              | Cattle   | USA     |      | 459             | 42                             |
| NC 008787     | 27  | 1616554              | Clinical | USA     | 2007 | 604             | 42                             |
| 97            | 85  | 1654563              | Cattle   | UK      | 2003 | 3583            | 42                             |
| F2B7          | 106 | 1714044              | Chicken  | UK      | 2005 | 51              | 443                            |
| CjLMG9217     | 188 | 1663474              | Clinical | Belgium |      | 443             | 443                            |
| CjLMG23263    | 177 | 1739638              | Chicken  | Bosnia  |      | 3504            | 446                            |
| 45            | 32  | 1650105              | Clinical | UK      | 2005 | 11              | 45                             |
| 508-2327      | 79  | 1645238              | Chicken  | UK      | 2009 | 11              | 45                             |
| C8            | 4   | 1596969              | Chicken  | UK      | 2005 | 45              | 45                             |
| 7816          | 56  | 1607778              | Cattle   | UK      | 2006 | 45              | 45                             |
| 508-2426      | 70  | 1595762              | Chicken  | UK      | 2009 | 45              | 45                             |
| S07-S237      | 82  | 1631119              | Chicken  | UK      | 2009 | 45              | 45                             |
| 508-2944      | 84  | 1605483              | Chicken  | UK      | 2009 | 45              | 45                             |
| 113           | 90  | 1603131              | Cattle   | UK      | 2003 | 45              | 45                             |
| 218           | 91  | 1602224              | Cattle   | UK      | 2003 | 45              | 45                             |
| 222           | 92  | 1607691              | Cattle   | UK      | 2003 | 45              | 45                             |
| 234           | 104 | 1654338              | Cattle   | UK      | 2003 | 45              | 45                             |
| F4A6          | 111 | 1649834              | Chicken  | UK      | 2004 | 45              | 45                             |
| F7C3          | 112 | 1618948              | Chicken  | UK      | 2004 | 45              | 45                             |
| 5             | 119 | 1621668              | Clinical | UK      | 2003 | 45              | 45                             |
| CT86857_2.6.4 | 124 | 1603669              | Starling | UK      | 2007 | 45              | 45                             |
| Duck184       | 131 | 1616162              | Duck     | UK      | 2007 | 45              | 45                             |

**Table S2 - continued.**

| Isolate       | ID  | Total length<br>(bp) | source               | country      | year | ST <sup>1</sup> | clonal<br>complex <sup>2</sup> |
|---------------|-----|----------------------|----------------------|--------------|------|-----------------|--------------------------------|
| Cj55037       | 181 | 1598300              | Chicken              | USA          |      | 45              | 45                             |
| 124           | 100 | 1626334              | Cattle               | UK           | 2003 | 137             | 45                             |
| goose95       | 128 | 1600143              | Goose                | UK           | 2007 | 137             | 45                             |
| 4153          | 55  | 1625711              | Clinical             | UK           | 2006 | 230             | 45                             |
| F9C2          | 114 | 1633592              | Chicken              | UK           | 2004 | 230             | 45                             |
| 8697          | 52  | 1616567              | Cattle               | UK           | 2006 | 334             | 45                             |
| 6764          | 57  | 1620325              | Chicken              | UK           | 2005 | 334             | 45                             |
| 39            | 103 | 1641790              | Cattle               | UK           | 2003 | 334             | 45                             |
| 7648-2        | 45  | 1609163              | Chicken              | UK           | 2006 | 583             | 45                             |
| 165           | 102 | 1607515              | Cattle               | UK           | 2003 | 583             | 45                             |
| S07-0175      | 81  | 1617200              | Chicken              | UK           | 2009 | 1003            | 45                             |
| 6618B         | 39  | 1616482              | Chicken              | UK           | 2005 | 2219            | 45                             |
| 8058          | 49  | 1663148              | Cattle               | UK           | 2006 | 38              | 48                             |
| Cj1893        | 210 | 1700567              | Cattle               | USA          |      | 38              | 48                             |
| CjLMG23218    | 175 | 1677541              | Chicken              | Belgium      |      | 48              | 48                             |
| Cj1997-4      | 196 | 1669690              | Clinical             | USA          |      | 475             | 48                             |
| Cj86605       | 183 | 1637051              | Chicken              | USA          |      | 4840            | 48                             |
| Cj1213        | 206 | 1673339              | Cattle               | USA          |      | 132             | 508                            |
| CjLMG9081     | 186 | 1593688              | Clinical             | SouthAmerica |      | 52              | 52                             |
| 508-3501      | 68  | 1838022              | Chicken              | UK           | 2009 | 573             | 573                            |
| F6_8          | 107 | 1838061              | Chicken              | UK           | 2004 | 1079            | 573                            |
| F10A2         | 108 | 1743461              | Chicken              | UK           | 2004 | 574             | 574                            |
| Cj2008-872    | 191 | 1605881              | Clinical             | France       |      | 61              | 61                             |
| 7802A         | 13  | 1551351              | Cattle               | UK           | 2006 | 61              | 61                             |
| 82            | 86  | 1659558              | Cattle               | UK           | 2003 | 61              | 61                             |
| Cj1997-7      | 197 | 1633444              | Clinical             | USA          |      | 61              | 61                             |
| Cj1798        | 208 | 1604776              | Cattle               | USA          |      | 61              | 61                             |
| Cj140-16      | 205 | 1677874              | Cattle               | USA          |      | 5161            | 61                             |
| Cj1997-1      | 193 | 1603628              | Clinical             | USA          |      | 658             | 658                            |
| 7031          | 64  | 1698035              | Chicken              | UK           | 2006 | 814             | 661                            |
| F8C6          | 109 | 1759789              | Chicken              | UK           | 2004 | 814             | 661                            |
| 508-3789      | 69  | 1821236              | Chicken              | UK           | 2009 | 2568            | 661                            |
| CjLMG9872     | 212 | 1619961              | Clinical             | Sweden       |      | 677             | 677                            |
| CL95044_4.6.4 | 125 | 1578916              | Starling             | UK           |      | 1020            | 682                            |
| Duck229       | 130 | 1669953              | Duck                 | UK           | 2007 | 702             | 702                            |
| Cj23210       | 213 | 1762534              | Chicken              | Belgium      |      | 380             | -                              |
| CjLMG23223    | 176 | 1701738              | Chicken              | Belgium      |      | 791             | -                              |
| Cj1854        | 209 | 1619643              | Cattle               | USA          |      | 922             | -                              |
| Cj2008-894    | 190 | 1627102              | Clinical             | France       |      | 1962            | -                              |
| Cj2008-979    | 194 | 1798587              | Clinical             | France       |      | 2274            | -                              |
| PH325         | 14  | 1543877              | Environmental waters | New Zealand  | 2001 | 2381            | -                              |

**Table S2 - continued.**

| Isolate    | ID  | Total length<br>(bp) | source   | country | year | ST <sup>1</sup> | clonal<br>complex <sup>2</sup> |
|------------|-----|----------------------|----------|---------|------|-----------------|--------------------------------|
| CjLMG23216 | 174 | 1708741              | Chicken  | Belgium |      | 4835            | -                              |
| Cj60004    | 178 | 1674182              | Chicken  | USA     |      | 4836            | -                              |
| Cj1997-10  | 198 | 1791227              | Clinical | USA     |      | 4839            | -                              |
| 7487       | 30  | 1613621              | Clinical | UK      | 2007 | -               | -                              |
| 77         | 96  | 1894874              | Cattle   | UK      | 2003 | -               | -                              |
| 585        | 116 | 1656471              | Clinical | UK      | 2005 | -               | -                              |

<sup>1</sup>Isolates with a Cj prefix were published elsewhere.

<sup>2</sup>Sequence type (ST) was derived from the allelic profile of 7 housekeeping genes by multilocus sequence typing (MLST) and confirmed by whole genome sequencing.

<sup>3</sup>Clonal complexes are defined as including any ST that matches a previously defined central genotype (<http://pubmlst.org/campylobacter/>) at three or more loci.
