# Supplementary material for: Cryptic ecology among host generalist Campylobacter jejuni in domestic animals
Source: PubMed Central journal article supplement (PMC4237157; doi:10.1111/mec.12742), 2014-04-25
Supplement: mec0023-2442-SD11.pdf [file mec0023-2442-SD11.pdf]

**Table S3** – Function of genes found differentially in the ST-21 or ST-45 clonal complexes

| Present in ST-21 complex and absent from >90% ST-45 complex isolates |                                                |       |
|----------------------------------------------------------------------|------------------------------------------------|-------|
| Gene <sup>1</sup>                                                    | Function                                       | Ref   |
| Cj0055c                                                              | Unknown                                        | (1)   |
| Cj0056c                                                              | unknown                                        | (1)   |
| Cj0057                                                               | possible periplasmic protein                   | (1)   |
| Cj0058                                                               | possible periplasmic protein                   | (1)   |
| Cj0122                                                               | unknown                                        | (1)   |
| Cj0177                                                               | putative iron transport protein                | (2)   |
| Cj0178                                                               | TonB dependent receptor                        | (2,3) |
| exbB1                                                                | putative iron transport protein                | (4)   |
| exbD1                                                                | putative iron transport protein                | (4)   |
| tonB1                                                                | putative iron transport protein                | (4)   |
| Cj0380c                                                              | unknown                                        | (1)   |
| Cj0424                                                               | Functional link to iron stimulation            | (4,5) |
| Cj0425                                                               | Functional link to iron stimulation            | (4,5) |
| Cj0480c                                                              | L-fucose metabolism                            | (6)   |
| dapA                                                                 | L-fucose metabolism                            | (1)   |
| uxaA'                                                                | L-fucose metabolism                            | (1)   |
| uxaA'                                                                | L-fucose metabolism                            | (1)   |
| Cj0484                                                               | L-fucose metabolism                            | (1)   |
| Cj0485                                                               | L-fucose metabolism                            | (1)   |
| Cj0486                                                               | L-fucose metabolism                            | (1)   |
| Cj0487                                                               | L-fucose metabolism                            | (1)   |
| Cj0488                                                               | L-fucose metabolism                            | (1)   |
| ald'                                                                 | L-fucose metabolism                            | (1)   |
| ald'                                                                 | L-fucose metabolism                            | (1)   |
| Cj0566                                                               | unknown                                        | (1)   |
| Cj0567                                                               | putative iron transport protein                | (4)   |
| Cj0568                                                               | unknown                                        | (1)   |
| Cj0569                                                               | unknown                                        | (7)   |
| Cj0618                                                               | Possibly involved in flagellin glycosylation   | (1)   |
| Cj0690c                                                              | Type I restriction enzyme                      | (1)   |
| Cj0737                                                               | Putative adhesin                               | (1)   |
| Cj0738                                                               | unknown                                        | (1)   |
| Cj0739                                                               | unknown                                        | (1)   |
| Cj0740                                                               | unknown                                        | (1)   |
| Cj0747                                                               | unknown                                        | (1)   |
| Cj0748                                                               | unknown                                        | (8)   |
| tonB3                                                                | Iron regulated tonB protein                    | (4)   |
| cfrA                                                                 | putative iron uptake protein (ferric receptor) | (4)   |
| Cj0818                                                               | putative iron- and Fur-regulated lipoprotein   | (1)   |
| Cj0819                                                               | putative iron transport protein                | (4)   |
| Cj1122c                                                              | unknown                                        | (1)   |
| Cj1135                                                               | lipooligosaccharide synthesis                  | (1)   |
| Cj1297                                                               | antimicrobial efflux pump                      | (1)   |
| hsdR                                                                 | putative type I restriction enzyme protein     | (1)   |
| rloH                                                                 | putative ATP/GTP-binding protein               | (1)   |
| hsdS                                                                 | putative type I restriction enzyme protein     | (1)   |
| mloB                                                                 | unknown                                        | (1)   |
| hsdM                                                                 | putative type I restriction enzyme protein     | (1)   |

|         |                                           |     |
|---------|-------------------------------------------|-----|
| Cj1555c | hypothetical protein                      | (1) |
| Cj1585c | putative oxidoreductase                   | (1) |
| Cj1668c | putative periplasmic protein              | (1) |
| Cj1725  | putative periplasmic protein              | (1) |
| metA    | homoserine O-succinyltransferase          | (5) |
| metB    | putative O-acetylhomoserine (thiol)-lyase | (5) |
| PAN0484 | hypothetical protein                      | -   |
| PAN0513 | hypothetical protein                      | -   |
| PAN1954 | hypothetical protein                      | -   |
| PAN2855 | Predicted metal-dependent hydrolase       | -   |
| PAN2856 | putative tartrate transporter             | -   |
| PAN2879 | putative periplasmic protein              | -   |
| PAN3003 | unknown                                   | -   |
| PAN3004 | unknown                                   | -   |
| PAN3069 | hypothetical protein                      | -   |
| PAN3181 | hypothetical protein                      | -   |
| PAN3324 | putative periplasmic protein              | -   |
| PAN3325 | putative periplasmic protein              | -   |

---

Present in ST-45 complex and absent from >90% ST-21 complex isolates

| Gene <sup>1</sup> | Function                                             | Ref |
|-------------------|------------------------------------------------------|-----|
| PAN0180           | 3',5'-cyclic-nucleotide phosphodiesterase            | -   |
| PAN0367           | 4-carboxymuconolactone decarboxylase                 | -   |
| PAN1906           | alginate O- acetylation protein                      | -   |
| PAN0370           | Anaerobic dimethyl sulfoxide reductase chain A       | -   |
| PAN2385           | Arsenic efflux pump protein                          | -   |
| PAN1864           | arylsulfate sulfotransferase                         | -   |
| PAN0958           | binding-protein-dependent transport system component | -   |
| PAN1841           | BII0374 protein                                      | -   |
| PAN1696           | conserved hypothetical protein                       | -   |
| PAN1302           | DNA methylase-type I restriction-modification system | -   |
| PAN1761           | DNA methylase-type I restriction-modification system | -   |
| PAN1061           | Ferrochelatase, protoheme ferro-lyase                | -   |
| PAN0137           | hypothetical protein                                 | -   |
| PAN0387           | hypothetical protein                                 | -   |
| PAN2369           | hypothetical protein                                 | -   |
| PAN0368           | hypothetical protein                                 | -   |
| PAN0390           | hypothetical protein                                 | -   |
| PAN0361           | hypothetical protein                                 | -   |
| PAN0384           | hypothetical protein                                 | -   |
| PAN2592           | hypothetical protein                                 | -   |
| PAN0953           | hypothetical protein                                 | -   |
| PAN1543           | hypothetical protein                                 | -   |
| PAN0363           | hypothetical protein                                 | -   |
| PAN1297           | hypothetical protein                                 | -   |
| PAN0608           | hypothetical protein                                 | -   |
| PAN1851           | hypothetical protein                                 | -   |
| PAN1006           | hypothetical protein                                 | -   |
| PAN3380           | hypothetical protein                                 | -   |
| PAN0358           | Glucose-1-phosphate thymidyltransferase              | -   |
| PAN2754           | Hemerythrin-like iron-binding protein                | -   |
| PAN0035           | hypothetical protein                                 | -   |

|         |                                                               |   |
|---------|---------------------------------------------------------------|---|
| PAN0037 | hypothetical protein                                          | - |
| PAN0364 | hypothetical protein                                          | - |
| PAN0385 | hypothetical protein                                          | - |
| PAN0386 | hypothetical protein                                          | - |
| PAN0594 | hypothetical protein                                          | - |
| PAN0746 | hypothetical protein                                          | - |
| PAN0957 | hypothetical protein                                          | - |
| PAN1490 | hypothetical protein                                          | - |
| PAN1491 | hypothetical protein                                          | - |
| PAN1535 | hypothetical protein                                          | - |
| PAN1616 | hypothetical protein                                          | - |
| PAN1793 | hypothetical protein                                          | - |
| PAN1849 | hypothetical protein                                          | - |
| PAN2215 | hypothetical protein                                          | - |
| PAN2216 | hypothetical protein                                          | - |
| PAN0388 | IncF plasmid conjugative transfer protein TraG                | - |
| PAN3295 | IncF plasmid conjugative transfer protein TraG                | - |
| PAN0389 | IncF plasmid conjugative transfer protein TraN                | - |
| PAN0374 | lipopolysaccharide core biosynthesis protein LpsA             | - |
| PAN0609 | MGC82361 protein                                              | - |
| PAN0359 | Probable poly(beta-D-mannuronate) O-acetylase                 | - |
| PAN1630 | Putative periplasmic protein                                  | - |
| PAN1663 | Putative periplasmic protein                                  | - |
| PAN0391 | Putative phage protein                                        | - |
| PAN2285 | RloB                                                          | - |
| PAN1536 | sugar ABC transporter, periplasmic sugar-binding protein      | - |
| PAN0036 | sugar binding protein of ABC transporter                      | - |
| PAN1441 | TraG-like protein                                             | - |
| PAN3202 | transporter, putative                                         | - |
| PAN3269 | Type I restriction-modification enzyme M subunit              | - |
| PAN0366 | Type I restriction-modification system, DNA-methyltransferase | - |
| PAN0362 | Type I restriction-modification system, restriction subunit R | - |
| PAN0365 | Type I restriction-modification system, specificity subunit S | - |
| PAN2410 | Type I restriction-modification system, specificity subunit S | - |
| PAN3397 | Type I restriction-modification system, specificity subunit S | - |
| PAN0360 | unknown                                                       | - |

<sup>1</sup>Genes with a PAN prefix were identified in this study by aligning genomes with progressiveMauve (9) and assigning putative functions to non-core open reading frames using the RAST server (10).

## References

1. J. Parkhill *et al.*, *Nature* **403**, 665 (2000).
2. C. E. Miller, P. H. Williams, J. M. Ketley, *Microbiology* **155**, 3157 (Oct, 2009).
3. K. Palyada, D. Threadgill, A. Stintzi, *J Bacteriol* **186**, 4714 (Jul, 2004).
4. K. Holmes *et al.*, *Microbiology* **151**, 243 (Jan, 2005).
5. R. R. Chaudhuri *et al.*, *Microbiology* **157**, 2922 (Oct, 2011).
6. M. A. Javed *et al.*, *Microbiology* **156**, 1134 (Apr, 2010).
7. N. Dorrell *et al.*, *Genome Res* **11**, 1706 (2001).

8. A. Metris, M. Reuter, D. J. Gaskin, J. Baranyi, A. H. van Vliet, *BMC Genomics* **12**, 535 (2011).
9. A. E. Darling, I. Miklos, M. A. Ragan, *PLoS Genet.* **4**, e1000128 (Jul, 2008).
10. R. K. Aziz *et al.*, *BMC Genomics* **9**, 75 (2008).
