# Supplementary material for: Cryptic ecology among host generalist Campylobacter jejuni in domestic animals
Source: PubMed Central journal article supplement (PMC4237157; doi:10.1111/mec.12742), 2014-04-25
Supplement: mec0023-2442-SD13.pdf [file mec0023-2442-SD13.pdf]

**Table S5** – Main clonal complex and hierarchical BAPS clusters based on genome-wide SNP data, excluding those sites that were significantly recombinant in the BratNextGen analysis.

| Clonal Complex | BAPS cluster A | BAPS cluster B     | Generalist/Specialist <sup>1</sup> |
|----------------|----------------|--------------------|------------------------------------|
| 21             | 1              | 1.1, 1.2           | Generalist                         |
| 48             | 1              | 1.3                | Generalist                         |
| 206            | 1              | 1.3                | Generalist                         |
| 61             | 1              | 1.4                | Specialist                         |
| 353            | 2              | 2.1                | Specialist                         |
| 443            | 2              | 2.1                | Specialist                         |
| 354            | 2              | 2.1                | Specialist                         |
| 257            | 2              | 2.2                | Specialist                         |
| 179            | 3              | 3.1                | Specialist                         |
| 177            | 3              | 3.1                | Specialist                         |
| 573            | 3              | 3.2                | Specialist                         |
| 661            | 3              | 3.2                | Specialist                         |
| 45             | 4              | 4.1, 4.2, 4.3, 4.4 | Generalist                         |
| 283            | 4              | 4.4                | Specialist                         |
| 42             | 3              | 3.3                | Specialist                         |
| 682            | 3              | 3.1                | Specialist                         |

<sup>1</sup>Generalist and specialist definitions are derived from STs of 2,764 isolates from cattle, chicken and wild bird/environmental sources with a 70%-30% cut off as in Figure 1B.
