# Supplementary material for: Cryptic ecology among host generalist Campylobacter jejuni in domestic animals
Source: Mol Ecol. 2014 Apr 25;23(10):2442–51. doi: 10.1111/mec.12742 (PMC4237157; doi:10.1111/mec.12742)
Supplement: Table S1 — Genetic connectivity of the clonal complexes measured by relative amount of significant admixture in BAPS analysis [file mec0023-2442-SD9.pdf]

**Table S1** – Genetic connectivity of the clonal complexes measured by relative amount of significant admixture in BAPS analysis

[illegible]
